# Supplementary material for: Immunohistochemical Expression of Five Protein Combinations Revealed as Prognostic Markers in Asian Oral Cancer
Source: PubMed Central journal article supplement (PMC8083901; doi:10.3389/fgene.2021.643461), 2021-04-15
Supplement: Image_1.pdf [file Image_1.pdf]

| Protein<br>(Location) | Cancer<br>Low Expression                                                            | Cancer<br>High Expression                                                           | Normal Tissue<br>Low Expression                                                      | Normal Tissue<br>High Expression                                                      |
|-----------------------|-------------------------------------------------------------------------------------|-------------------------------------------------------------------------------------|--------------------------------------------------------------------------------------|---------------------------------------------------------------------------------------|
| BRCA1(N)              | 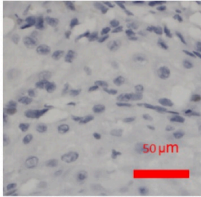   |    |    |    |
| CDH3(C)               |    |    |    |    |
| CDH3(N)               |    |    |    |    |
| CDK6(C)               |   |   |   |   |
| CSNK1E(C)             |  |  |  |  |
| EGFR(C)               |  |  |  |  |
| EGFR(M)               |  |  |  |  |
| FEN1(C)               |  |  |  |  |

FLNA(C)

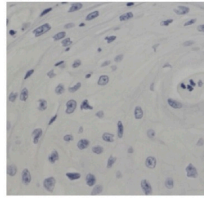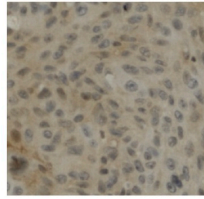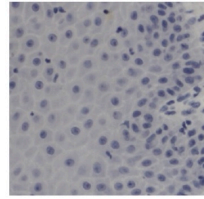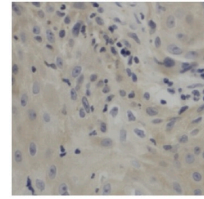

FLNA(N)

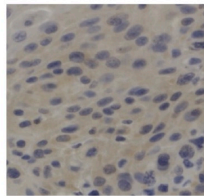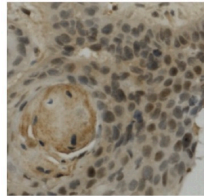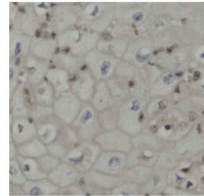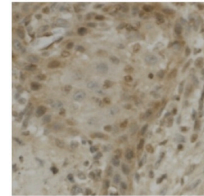

KRAS(C)

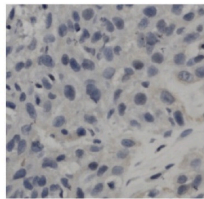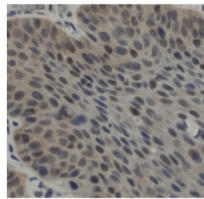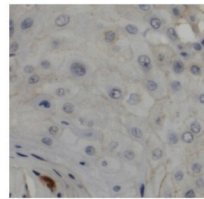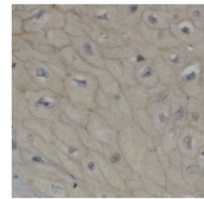

PhosphoMet(C)

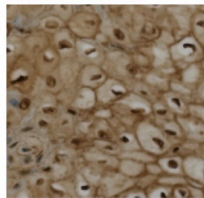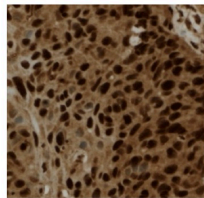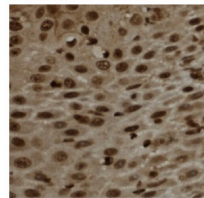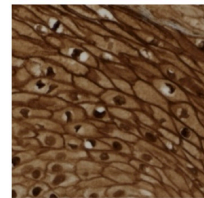

MSH2(N)

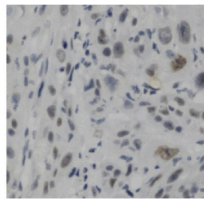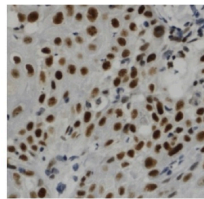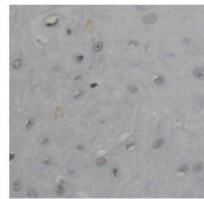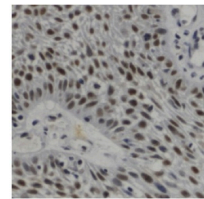

P16(C)

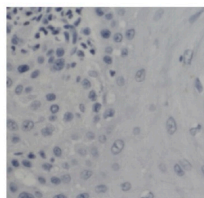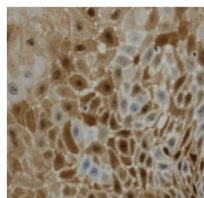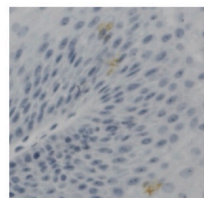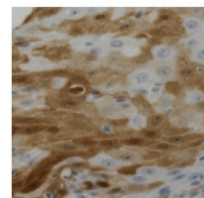

P16(N)

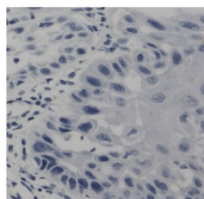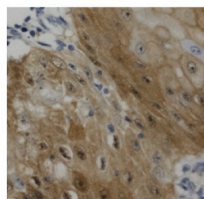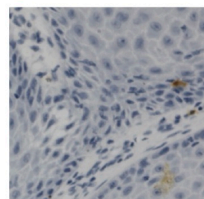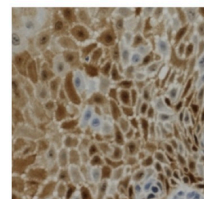

PARP1(N)

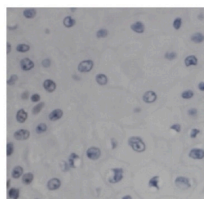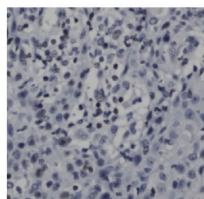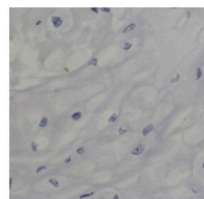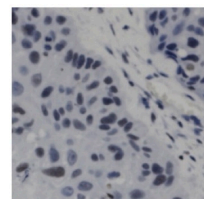

PIM1(C)

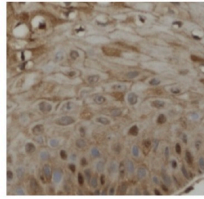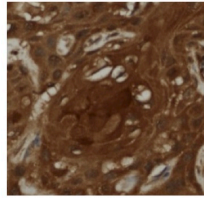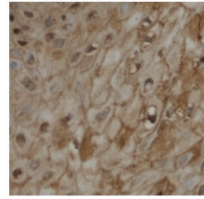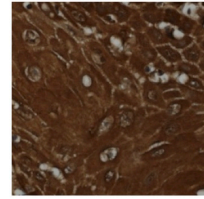

PIM1(N)

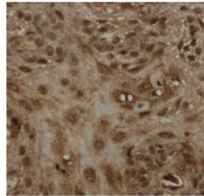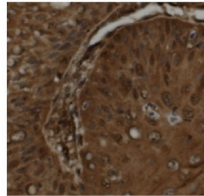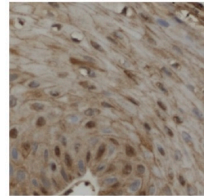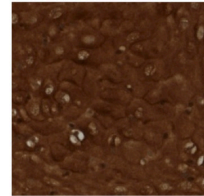

PLK1(C)

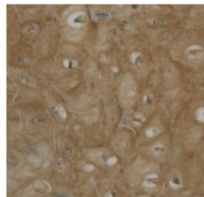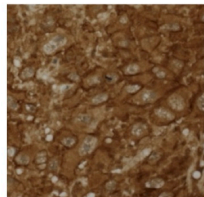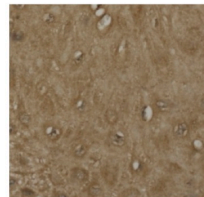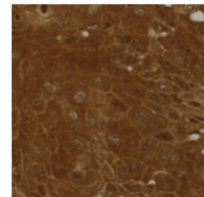

POLB(C)

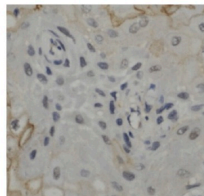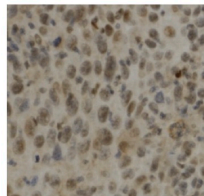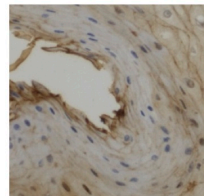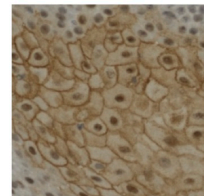

POLB(N)

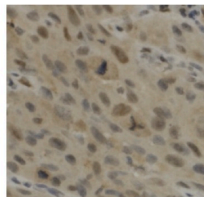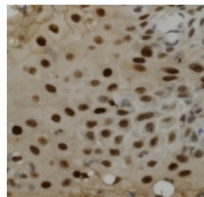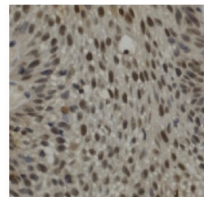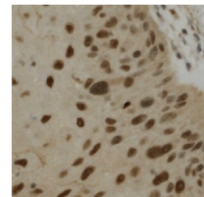

RAD54B(N)

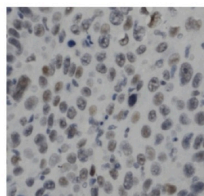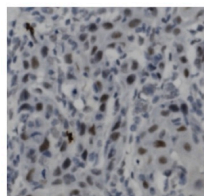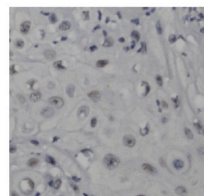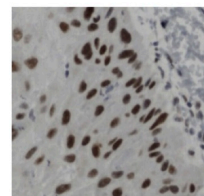

RB1(N)

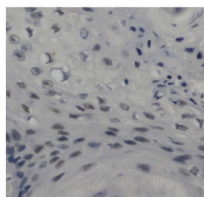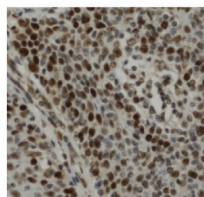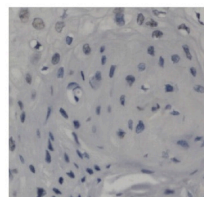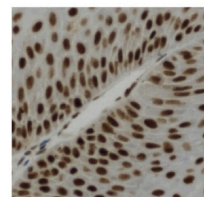

SGK2(C)

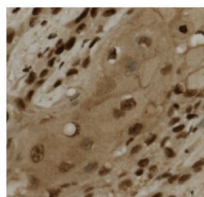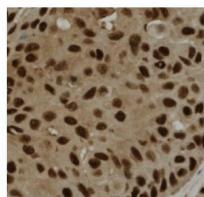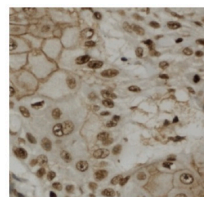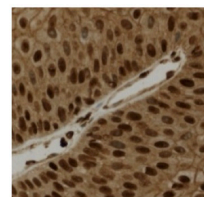

SHC1(C)

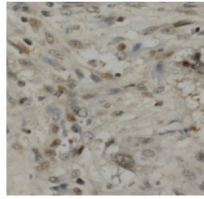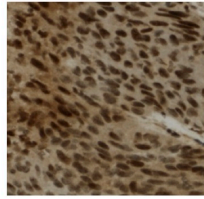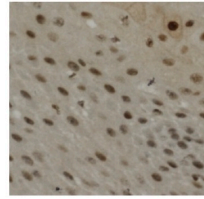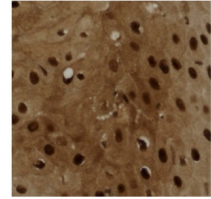

SHC1(N)

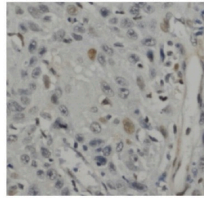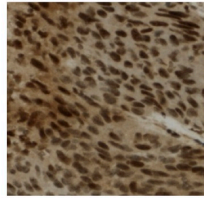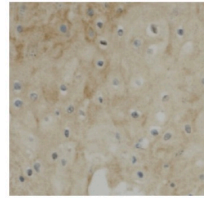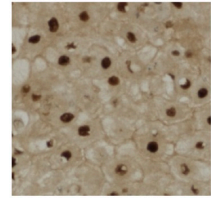

STK17A(C)

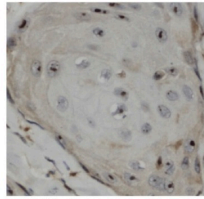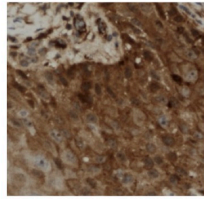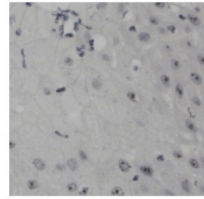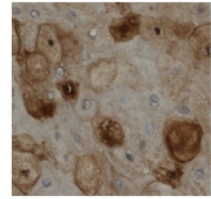

STK17A(N)

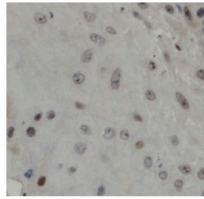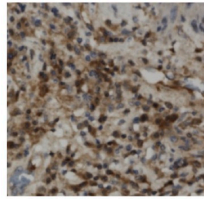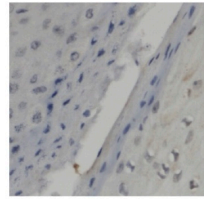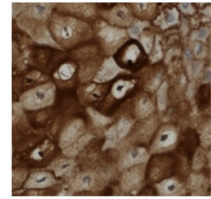

P53(N)

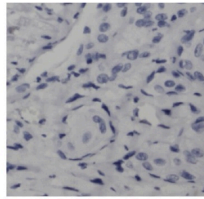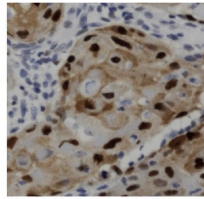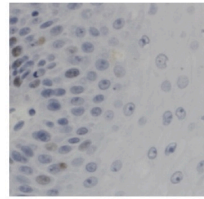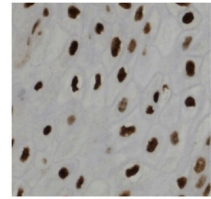

Additional information:

| RB1(N)                                                                             |                                                                                    |
|------------------------------------------------------------------------------------|------------------------------------------------------------------------------------|
| (A) Score 0 (Negative)                                                             | (B) Score 1+                                                                       |
| 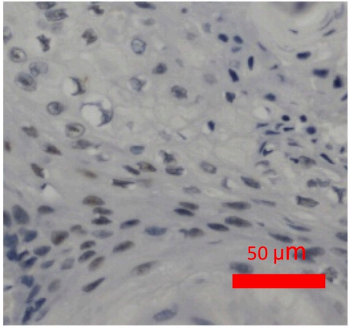  |   |
| (C) Score 2+                                                                       | (D) Score 3+                                                                       |
|  |  |

Note:

IHC staining was classified into four categories. (A) score 0 (negative) indicates very faint or absent staining, (B) score 1+ indicates weak staining, (C) score 2+ indicates moderate staining, and (C) score 3+ indicates strong staining based on staining intensity.
