# Supplementary material for: Immunohistochemical Expression of Five Protein Combinations Revealed as Prognostic Markers in Asian Oral Cancer
Source: PubMed Central journal article supplement (PMC8083901; doi:10.3389/fgene.2021.643461), 2021-04-15
Supplement: Table_1.pdf [file Table_1.pdf]

**Table S1. The antibodies and retrieval buffers for each protein.**

| Protein Name | Clonality         | Source           | Catalogue number | Dilution | Retrieval buffer |
|--------------|-------------------|------------------|------------------|----------|------------------|
| BRCA1        | Mouse monoclonal  | Zeta Corporation | Z2237            | 1:100    | Tris-EDTA buffer |
| CDH3         | Rabbit polyclonal | Abgent           | AP1499B          | 1:50     | Tris-EDTA buffer |
| CDK6         | Rabbit monoclonal | Abcam Ltd        | ab124821         | 1:100    | Tris-EDTA buffer |
| CSNK1E       | Rabbit polyclonal | Abgent           | AP7403a          | 1:50     | Tris-EDTA buffer |
| EGFR         | Rabbit monoclonal | Zeta Corporation | Z2037            | 1:50     | Tris-EDTA buffer |
| FEN1         | Rabbit polyclonal | Abcam Ltd        | ab70815          | 1:1000   | Tris-EDTA buffer |
| FLNA         | Rabbit polyclonal | Abgent           | AP7770a          | 1:50     | Tris-EDTA buffer |
| KRAS         | Rabbit polyclonal | Abcam Ltd        | ab216890         | 1:200    | Citrate buffer   |
| MET          | Rabbit polyclonal | Abgent           | AP3167a          | 1:50     | Citrate buffer   |
| MSH2         | Mouse monoclonal  | Zeta Corporation | Z2129            | 1:100    | Tris-EDTA buffer |
| P16          | Mouse monoclonal  | BD biosciences   | 550834           | 1:100    | Tris-EDTA buffer |
| PARP1        | Rabbit monoclonal | Abcam Ltd        | Ab191217         | 1:500    | Tris-EDTA buffer |
| PIM1         | Rabbit polyclonal | Abgent           | AP7932d          | 1:50     | Tris-EDTA buffer |
| PLK1         | Rabbit polyclonal | Abgent           | AP7937a          | 1:100    | Citrate buffer   |
| POLB         | Rabbit polyclonal | Abgent           | AP50642          | 1:100    | Tris-EDTA buffer |
| RAD54B       | Rabbit polyclonal | Genetex          | GTX103291        | 1:500    | Tris-EDTA buffer |
| RB1          | Mouse monoclonal  | Leica Biosystems | NCL-L-RB-358     | 1:50     | Tris-EDTA buffer |
| SGK2         | Rabbit polyclonal | Abgent           | AP7947b          | 1:100    | Citrate buffer   |
| SHC1         | Rabbit polyclonal | Abgent           | AP50024          | 1:100    | Citrate buffer   |
| STK17A       | Rabbit polyclonal | Abcam Ltd        | ab97530          | 1:100    | Citrate buffer   |
| TP53         | Mouse monoclonal  | Leica Biosystems | NCL-L-p53-DO7    | 1:200    | Citrate buffer   |
