# Supplementary material for: Immunohistochemical Expression of Five Protein Combinations Revealed as Prognostic Markers in Asian Oral Cancer
Source: PubMed Central journal article supplement (PMC8083901; doi:10.3389/fgene.2021.643461), 2021-04-15
Supplement: Table_4.pdf [file Table_4.pdf]

| <b>Table S4a Multivariate Cox Regression</b> |                  |                              |                |                                   |
|----------------------------------------------|------------------|------------------------------|----------------|-----------------------------------|
| <b>Variable</b>                              | <b>Subset</b>    | <b>Hazard ratio (95% CI)</b> | <b>p-value</b> | <b>LR<sub>χ<sup>2</sup></sub></b> |
| RB1(N)                                       | ↑/↓              | 1.68 ( 0.87 - 3.24 )         | 0.122          | 18.3                              |
| Stage                                        | III–IV/I–II      | 2.13 ( 0.86 - 5.27 )         | 0.104          |                                   |
| Lymph node metastasis                        | yes/no           | 1.86 ( 0.78 - 4.47 )         | 0.163          |                                   |
| (CSNK1E(C), SHC1(N))                         | (↓, ↓)/otherwise | 8.89 ( 3.22 - 24.55 )        | 0.000          | 25.6                              |
| Stage                                        | III–IV/I–II      | 2.28 ( 0.91 - 5.76 )         | 0.080          |                                   |
| Lymph node metastasis                        | yes/no           | 1.96 ( 0.8 - 4.85 )          | 0.143          |                                   |
| (CSNK1E(C), RB1(N))                          | (↓, ↑)/otherwise | 2.13 ( 1.01 - 4.53 )         | 0.048          | 18.6                              |
| Stage                                        | III–IV/I–II      | 2.01 ( 0.81 - 4.99 )         | 0.133          |                                   |
| Lymph node metastasis                        | yes/no           | 1.90 ( 0.79 - 4.54 )         | 0.151          |                                   |
| (BRCA1(N), SHC1(N))                          | (↓, ↓)/otherwise | 2.7 ( 1.04 - 7.01 )          | 0.042          | 18.3                              |
| Stage                                        | III–IV/I–II      | 2.45 ( 0.98 - 6.15 )         | 0.056          |                                   |
| Lymph node metastasis                        | yes/no           | 1.63 ( 0.67 - 3.98 )         | 0.286          |                                   |

| <b>Table S4b Multivariate Cox Regression on combinations of two significant markers</b> |  |                              |                |                                   |
|-----------------------------------------------------------------------------------------|--|------------------------------|----------------|-----------------------------------|
| <b>Variable</b>                                                                         |  | <b>Hazard ratio (95% CI)</b> | <b>p-value</b> | <b>LR<sub>χ<sup>2</sup></sub></b> |
| CSNK1E(C)-SHC1(N) (↓, ↓) and<br>FLNA(C)-KRAS(C) (↑, ↑) <sup>c*</sup>                    |  | 12.76 ( 3.95 - 41.21 )       | 0.000          | 23.12                             |
| Stage                                                                                   |  | 1.62 ( 0.59 - 4.44 )         | 0.348          |                                   |
| Lymph node metastasis                                                                   |  | 2.64 ( 0.96 - 7.28 )         | 0.060          |                                   |
| BRCA1(N)-SHC1(N) (↓, ↓) and<br>FLNA(C)-KRAS(C) (↑, ↑) <sup>c</sup>                      |  | 2.91 ( 1.1 - 7.68 )          | 0.031          | 16.08                             |
| Stage                                                                                   |  | 1.99 ( 0.75 - 5.32 )         | 0.169          |                                   |
| Lymph node metastasis                                                                   |  | 1.81 ( 0.7 - 4.69 )          | 0.223          |                                   |

\*The symbol (↑, ↑)<sup>c</sup> denotes the complementary set of (↑, ↑), namely (↓, ↑), (↑, ↓) and (↓, ↓), in which FLNA(C)-KRAS(C) is in the same direction (poor OS) as that of BRCA1(N)-SHC1(N).
